# Supplementary material for: Large-scale mapping of gene regulatory logic reveals context-dependent repression by transcriptional activators
Source: HighWire-hosted journal article supplement (doi:10.1101/gr.212316.116), 2016-12-13
Supplement: Supplement.docx [file Supplement.docx]

**Supplement**

Thermodynamic model 1

Binding affinities: 3

TF concentration: 3

Interaction weights: 3

Expression from TBP occupancy: 3

Steric-hindrance: 4

TF sharing: 4

Toy model of activator site addition 4

# Thermodynamic model

Our aim is to predict gene expression from promoter DNA sequence features across several transcriptional-activator concentrations. In specific, our input sequences are 128 promoters that contain 0 to 7 activator Gcn4 binding sites in 7 predefined positions for all (27) possible configurations. We use a thermodynamic model (Shea & Ackers 1985, Gertz et al., 2009) that predicts gene expression by enumerating all promoter configurations and computing the probability of TBP binding (*P(TBP)*), which then is converted to gene expression via a sigmoid function (Eq.1).

(1)

Where and are the minimum and maximum expression respectively, is the at which expression is half maximal and is the hill-coefficient and describes how switch-like expression is as a function of TBP binding. This sigmoid function describes both transcription and translation.

Both expression (as a function of P(TBP)) and [TF] (as a function of growth condition) are modeled with the same sigmoid function (Eq.2).

(2)

The probability of TBP binding is computed through the relative weight of TBP-bound to TBP-unbound configurations (Eq.3).

(3)

Where is the statistical weight of configuration *c*, which is computed as (Eq.4):

(4)

Where is an indicator function of whether the TF is bound in site , reflects an interaction between bound TF molecules and would be positive for cooperative interaction. In our case we use this as a negative weight to model steric hindrance. is the interaction weight of bound TF to bound TBP and is either specific to each site position or shared across all positions. This weight can be interpreted as the contribution of a bound TF to initiating transcription.

When we assume that sites act independently or for steric hindrance #TFBS = 1. When we assume TF sharing we set #TFBS to the number of binding sites per promoter.

Finally we assume that the TF concentration follows a sigmoid as a function of the conditions (Eq.5).

(5)

Where [*AA*] is the amino acid concentration that is varied across conditions (see Methods). and are the maximal and minimal TF concentrations. *H* is the hill-coefficient.

For the steric hindrance model we use a negative Wcoop (Eq.4) . For the TF sharing model we set Wcoop to 0 and compute an effective TF concentration ([TF]eff) by dividing the [TF] by number of binding sites. The amount of sharing is set by Wshare as follows: [TF] eff = [TF] / (Ntf * Wshare), where Ntf is the number of binding sites.

Next we describe the free parameters of the model that were fitted in cross-validation. Accompanying data files (*_params.tab) contain the fitted values for each model.

#### Binding affinities:

Q_GCN4: binding affinity of Gcn4 (for sequence motif TGACTCA)

Q_TBP: binding affinity of TBP (this value is constant across all conditions, promoters)

#### TF concentration:

C_max: Maximum [TF]

C_mid: [AA] for which [TF] is half-maximal

C_H: Hill-coefficient for [TF] as a sigmoid function of [AA]

C_min: the minimum [TF] which is fixed to 1, since this parameter is redundant with the binding affinity of Gcn4.

#### Interaction weights:

W_GCN4_TBP: Interaction weight of bound Gcn4 with bound TBP

For position specific expression this is modeled with 7 separate parameters:

W_GCN4_TBP_PosX, where X = {22,36,50,64,78,92,106}, which is the position relative to the ATG.

#### Expression from TBP occupancy:

TBP2Exp_min: minimum expression

TBP2Exp_max: maximum expression

TB2Exp_mid: (*P*)TBP for which expression is half-maximal

TBP2Exp_h: Hill-coefficient

#### Steric-hindrance:

W_coop: (-tf) TF-TF interaction weight

#### TF sharing:

W_share: (-tf) weight that determines to what extent [TF] is shared between neighboring sites.

The number of parameters in each model is as follows:

| Binding site model | Interaction model | # of free parameters |
| --- | --- | --- |
| No position specific expression | No interaction | 11 |
| No position specific expression | Steric hindrance | 12 |
| No position specific expression | TF sharing | 12 |
| Position specific expression | No interaction | 17 |
| Position specific expression | Steric hindrance | 18 |
| Position specific expression | TF sharing | 18 |

# Toy model of activator site addition

Both steric hindrance and TF sharing may explain, in certain regimes, reduction of expression from adding an additional binding site. To better understand how and when these models that include interactions between binding sites predict expression reduction, we developed a toy thermodynamic mathematical model that describes expression change as a result from binding site addition.

We model the expression change from one to two activator binding sites by enumerating all possible binding configurations of the TFs and compute expression from the configurations that have at least one TF bound. Each of the two possible binding sites has its unique contribution to expression (i.e. interaction with the transcriptional machinery). The weight of each configuration is computed from the weight of the TFs (affinity * concentration) (parameter ). Per configuration expression is the sum of the product of TF weights and site-specific expression. Total promoter expression is then computed from the sum of expression over all configurations. The unbound configuration has weight 1 (arbitrary constant). We then assume (1) expression driven by each site is independent, or (2) steric hindrance: the double bound configuration has weight 0, or (3) TF sharing, in which, for the promoter with two sites the effective TF concentration is nuclear TF concentration divided by two. Next we compute expression change from site addition by subtracting the expression from two sites from the single site promoter. To determine which parameter regimes enable expression to decrease, we solve this equation and get the boundary condition in which site addition does not change expression. We can then easily find the regimes in which expression increases or decreases, namely when the expression driven by the second site (E2) is higher or lower, respectively, than the boundary condition.

Thus, the expression change as a result of addition of a second site, for independent expression is:

(6)

This value is always positive. Because we observe decreases in expression upon addition of a second binding site (Figures 3 & 4), this rules out independence. For steric hindrance,

(7)

Solving gives us the boundary condition for which expression does not change. At low [TF] (low ) this limit is low, thus at low [TF] we can only reduce expression when E2 << E1. This limit goes to E2 = E1 when [TF] goes to infinity, thus at high [TF] it becomes easier to reduce expression, i.e. only a small difference between E1 and E2 is necessary. So, even at high [TF] reduction will occur when the added site drives lower expression. This is not what we observe. Experimentally, the frequency of reduction decreases at high [TF], steric hindrance predicts the opposite, ruling out steric hindrance.

Finally for TF sharing we get

(8)

Solving gives us for which expression does not change. This is the upper limit of E2 for expression reduction, thus when E2 is below this limit we get expression reduction. At low [TF] (low ) this limit is high, thus at low [TF] it’s easy to reduce expression. This limit goes to E2 = 0 when [TF] goes to infinity, thus at high [TF] there is no expression reduction. This is the behavior that we observe, suggesting that TF sharing is the mechanism behind the expression reduction as a result of activator site addition.

Taken together, we find that while both steric hindrance and TF sharing have regimes in which site addition decreases expression, only TF sharing shows a decrease when [TF] is low and less or no decrease when [TF] is high. In contrast, the steric hindrance model gives the opposite behavior and shows an increase in expression reduction as the [TF] goes up. Thus, a theoretic investigation of the effect of activator site addition on expression shows that TF sharing and not steric hindrance is, at least qualitatively, able to explain the expression reduction that we observe mostly at high [AA].

In order to investigate why adding a binding site can reduce expression we performed the following analysis. We measure the expression driven by the promoter with no Gcn4 binding sites (O), the two promoters each with a single Gcn4 binding site ( promoter A, promoter B ), and the promoter with both binding sites ( promoter AB ). We observe that adding each binding site separately results in an increase in expression compared to the no binding site promoter (A>O and B>O), suggesting that these binding sites, at least in isolation, do not recruit transcriptional repressors. Importantly, these two binding sites in isolation drive different expression levels, with A driving higher expression than B. However, we observe that the two Gcn4 binding sites together often results in lower expression than the highest of the single promoters (AB < max(A,B) , and A>B)). The 'sharing' model suggests that the B (lower expression) binding site steals TF from A (the higher expression binding site), and therefore expression with AB is less than that from A (but still greater than expression from B). These results cannot be explained by additive repression.

To restate the conclusions of the TF sharing model, suppose you have two sites, A and B, in which A is a stronger site (having a larger transcriptional activation activity). Then under low [TF] (in which molecules of TF are limiting for gene expression), adding the new site B will reduce expression. But if you do the reverse, start with B and add A, expression goes up. So the result, consistent with the sharing model, is that at low [TF] with two sites, the expression tends to be intermediate between the individual sites.

**Supplementary data**

**Supplemental data 16 (expression_all_constructs.tab)**

Measured expression values of all constructs measured in the 6 conditions

**Supplemental data 17 (annotation_all_constructs.tab)**

Sequence annotations for all promoters in the library

**Supplemental data 18-23 (constructs_expression.tab)**

Predicted expression values for the different models: null (basic model), PSE (position specific expression), SH (steric hindrance), S (TF sharing), or a combination of these.

**Supplemental data 24-29 (params.tab)**

Model parameters for the different models: null (basic model), PSE (position specific expression), SH (steric hindrance), S (TF sharing), or a combination of these.
