# Supplementary material for: Large-scale mapping of gene regulatory logic reveals context-dependent repression by transcriptional activators
Source: HighWire-hosted journal article supplement (doi:10.1101/gr.212316.116), 2016-12-13
Supplement: Supplemental_Figures_legends.docx [file Supplemental_Figures_legends.docx]

**Supplemental Figure 1. Amino acid starvation induces Gcn4 transcription factor levels.** Shown is a serial dilution of amino acid concentration and the levels of Gcn4-GFP and a control TEF promoter driving mCherry. The Gcn4-GFP-HIS3 *ura3*::TEFpr-mCherry-URA3 strain is from the GFP collection. Cells were grown in SCD, washed, diluted into varying concentrations of SCD-HL media, and grown for eight hours.

**Supplemental Figure 2. Reproducibility between biological replicates and between isolated and high-throughput measurements.** All strains were grown in Synthetic Complete Dextrose (SCD) medium containing 2% dextrose with varying concentrations of amino acids. Shown are biological replicates of the high-throughout measurements (A, B) and isolated strains measured in plate reader (C). (A) shows condition 1 versus 2 and (B) shows condition 5 versus 6. These conditions were measured on different days. (C) shows 96 promoters that were isolated form the pooled library and measured using a plate-reader in high and low [AA] (equivalent to conditions 1 and 6). The X-axis shows expression measured in the high-throughput pooled experiment and the Y-axis shows the expression measured using the plate-reader for individual strains.

**Supplemental Figure 3. Changing the promoter sequence context or addition of a binding site for a repressor changes expression without changing dynamic range.** **(A)** Shown are expression at high and low [AA] for a set of promoters with a single Gcn4 binding site placed at different locations with the HIS3 (red, low nucleosome occupancy) or GAL1,10 (blue, high nucleosome occupancy) promoter context.(B) Shown are expression at high and low [AA] for a set of promoters with a single Gcn4 binding site placed at different locations (blue) and the same promoters with a Mig1/2 repressor-binding site added to the -36 position in the promoter. Addition of a repressor binding site moves expression along the line X=Y, and therefore affects [TF] independent expression.

**
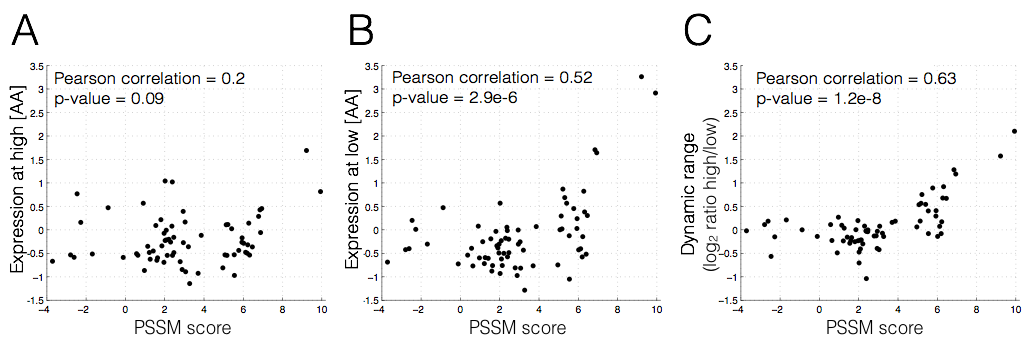
**

**Supplemental Figure 4. Mutations in the Gcn4 binding site that decrease the PSSM score decrease [TF] dependent expression. (A)** Expression at high [AA] for a set of promoters that differ only by the sequence at the single Gcn4 binding site in the promoter. **(B)** Expression at low [AA] for a set of promoters that differ only by the sequence at the single Gcn4 binding site in the promoter. **(C)** Dynamic range for each of the promoter calculated from the data shown in (A) and (B).

**Supplemental Figure 5. Expression saturates with binding site number for multiple transcription factors.** Inall panels, black lines connect the median value in each boxplot (column). **(A-D)** Shown are the measured expression levels (Y-axis) as a function of binding site number at four AA concentrations (see Methods) for Gcn4, Bas1, Leu3 and Met31 TFs. Each box is the set of promoters with 0 to 7 binding sites (different colors) measured at one of four conditions (x-axis). Black lines show the median expression per condition along the number of binding sites. **(E)** Various ways of graphing the Gcn4 binding site data. **(F)** Expression decreases when changing from 4 to >4 binding sites.

**Supplemental Figure 6. Repression is never below the minimum expression driven by the individual sites.** Shown is the minimum (A) and maximum (B) expression of the individual sites (X-axis)versus the expression of the promoter in which the sites are combined (Y-axis). Thus, each point is a promoter with N sites (1-7, colors) for which the expression is shown on the Y-axis. On the X-axis the minimum or maximum expression is shown computed on the expression values of the set of promoters that have only one binding site, namely the same as is present in the promoter that is depicted, e.g. for a promoter with 3 sites S1, S2 and S3 the minimum or maximum is computed on the expression values of the promoters that have only site S1, S2 or S3.

**Supplemental Figure 7. When adding a second near-by binding site, in-vivo expression and in-vitro binding increase less than expected by a thermodynamic model in which binding at the two sites is independent.** **(A)** Expression change as a function of adding a second Gcn4 site. Each point shows expression for a promoter with one Gcn4 site (X-axis) and the same promoter with a second site added (Y-axis). **(B)** Expression change for each promoter pair is shown (Y-axis) as a function of the distance between the two sites (X-axis). Dashed lines show the median change in expression across all binding site additions. The Y-axis in (B) is the (Y-axis in A) - (X-axis in A). **(C) Levo et al. 2015. Figure 3.** A set of sequences with a strong Gcn4 site placed at different locations along a specific sequence context, either in the presence of an additional strong Gcn4 site located in a fixed location (with the pink rectangle marking the location of the center of this site) (in red) or without this additional site (in blue). Shown is the log2 of the ratio of the binding score attained by each sequence (with the x-coordinate marking the location of the center of the site) divided by the median binding score across all sequences in this set. The black arrow points to a sequence where the 9-bp sites are separated by a single bp. Sequences with Gcn4 TFBSs of 9 bp placed along the HIS3-derived context (left panel) and along the GAL1-10–derived context (right panel). **(D) Levo et al. 2015. Figure 3.** For a set of sequences with all possible combinations of one to seven binding sites for Gcn4 in seven predefined locations, the average frequency of sequences with a single molecule of bound Gcn4 is shown as a function of the number of sites within the sequence (in blue). The predictions of these dependencies are based on a simple thermodynamic model assuming multiple TF binding events are independent and are also plotted (in black). At low [TF] (left panel), the amount of bound Gcn4 increases less slowly than is predicted from a thermodynamic model lacking negative interactions between TF binding sites. See Levo et al. for a detailed description of the experimental and computational methods.

**Supplemental Figure 8. TF sharing but not steric hindrance can best explain synergism at all amino acid concentrations. (A-F)** Measured versus predicted synergism for each [AA] (different colors) for six different thermodynamic models, fitted in 10-fold cross-validation to the measured data. Note that TF sharing is the only model that can generate negative synergism.

**Supplemental Figure 9. Only the TF sharing model is capable of producing strong negative synergism.** Shown is predicted expression of a single binding site (A) versus expression following the addition of another binding site (AB), for all six thermodynamic models. The top row of models have fewer points visible because they don’t have position-specific expression, so all promoters that differ only by the position of binding sites will have the same expression.

**Supplemental Figure 10. TF sharing and steric hindrance can explain expression saturation and small expression reductions at low [AA]. (A-F)** Predicted expression at low [AA] is shown as a function of binding site number for six different thermodynamic models, fitted in cross-validation to the Gcn4 measured data. Green lines show a predicted increase in expression upon binding site addition; red lines show a predicted decrease.

**Supplemental Figure 11. The cross-validated thermodynamic models do not exhibit excessive over-fitting.** All six thermodynamic models were fit to absolute expression level at all induction points. Shown is the R2 for predicted versus measured expression level **(A)** and synergism **(B)** for each training (blue) and test (red) data set. Error bars are standard deviation. **(C-F).** The model uses a single value for position specific expression. This value is fit taking into account all promoters and all conditions. The fit value from the position specific expression with TF sharing model is compared to measured expression levels from each of the single binding site promoters. **(G)** For comparison, the correlation between low and high AA conditions for the experimentally measured expression of all single binding site promoters.

**Supplemental Figure 12. Addition of large arrays of excess binding sites titrate away limiting TF molecules independent of the number of binding sites in the array.** Lee & Mahreshi used a strain in which YFP is activated by the tTA transcription factor, which is inhibited by doxycycline. Addition of doxycycline reduces the effective TF concentration. Into this strain they integrated into the genome either one or two arrays of extraneous tTA binding sites, with the arrays having 67, 127 or 240 binding sites. Data from Figure 3 were replotted to compare strains with approximately equal numbers of binding sites **(A,B)** or equal numbers of loci containing extraneous sites **(C,D)**. Splitting the binding sites across two loci increases the distance between the binding sites and results in a large decrease in expression (increase in titration of TF). However, adding extra binding sites to an existing locus results in little or no decrease in expression (no increase in TF titration).

**Supplemental Figure 13. At low [TF], addition of a binding site often results in a reduction in expression.** **(A,B)** Measured expression (and expression change, lines) when adding Gcn4 sites, for high (A) and low (B) [AA] Lines connect promoters that differ by only one binding site. Green lines indicate an expression increase when adding a binding site, red lines indicate that expression decreases. **(C,D)** A scatter plot showing the effect of adding a single Gcn4 site ‘B’ to the ‘A’ promoter, where the ‘A’ promoter has 0-6 binding sites (differently colored points) and the ‘AB’ promoter has (0-6)+1 sites. If the point is on the diagonal there is no effect of adding an additional binding site. For each AB promoter, synergism is the y-axis distance from the diagonal line. **(E,F)** Box-plots quantifying synergism — the log2 fold-change in expression when adding a binding site to promoters with 0 to 6 sites, for high (E) and low (F) [AA].

**Supplemental Figure 14. The effect of promoter and binding site mutations on [TF] dependent and independent expression. (A-C)** Expression data for a set of 20 sequences that only differ by a single point mutation made at different locations along the promoter. For each sequence the nucleosome occupancy over the TATA box was predicted using a thermodynamic model(27). **(A)** Shown is the effect of promoter point mutations on expression at low and high AA concentration; the dashed blue line is the best fit of a line with slope=1 to the data. The two scanning mutations that affect the Gcn4 binding site are identified with arrows. These mutations result in removal of the effect of [TF] on expression change. **(B)** The same data as in (A) with dynamic range (log2(low [AA] / [high AA])) graphed against expression at high [AA]. **(C)** Mutations that increase the predicted nucleosome occupancy over the TATA box decrease expression in a linear manner (fit red line). **(D)** A set of promoters, each with a single Gcn4 binding site, with single base mutations that affect the predicted affinity. Arrows mark the consensus sequence and the native His3 promoter sequence. Point mutations in a set of promoters with a single Fhl1 binding site are shown as a control. The dashed red line (slope=1) marks the sequence that gives the highest dynamic range in expression. **(E)** The same data as in (D) with dynamic range graphed against expression at high [AA]. **(F)** Mutations predicted to have a high Gcn4 binding site affinity have a high dynamic range (dashed red line), but the PSSM has less predictive power at low scores.

**Supplemental Figure 15. A small degree of technical variation in experiments across [AA] concentrations.** We observed condition specific expression differences that did not appear to stem from biological differences. For example, even the promoters that were not induced (such as Gal4 targets) varied, though slightly, across conditions in a non-monotonic manner **(Supplementary Fig. 15)**. These differences likely stem from day-to-day and experimental variability, as each condition was a separate batch and was sorted on different days.
